# Supplementary material
Source: MDPI journal article supplement (https://www.mdpi.com/2073-4352/2/3/1108)

## Supplementary Information

**Figure S1.** IR spectrum of 3,5-bis(4-fluorophenyl)-4,5-dihydro-1*H*-pyrazole-1-carboxamide (**1**).

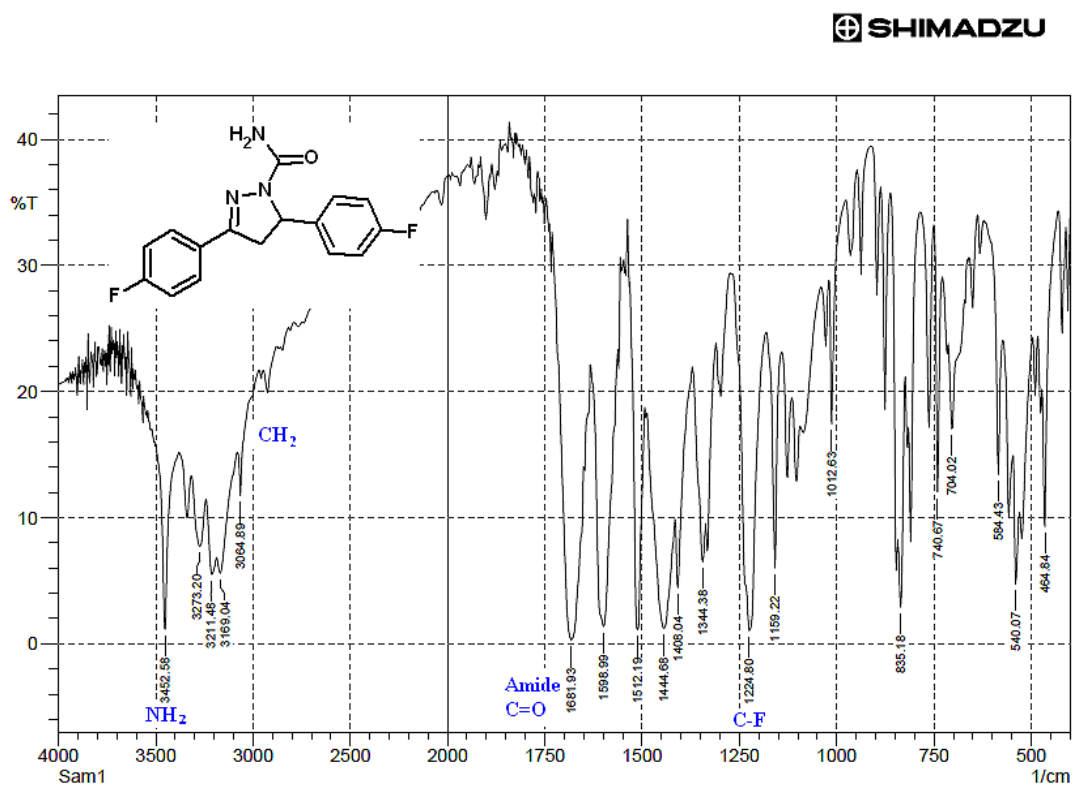

**Figure S2.** IR spectrum of 3,5-bis(4-fluorophenyl)-4,5-dihydro-1*H*-pyrazole-1-carbothioamide (**2**).

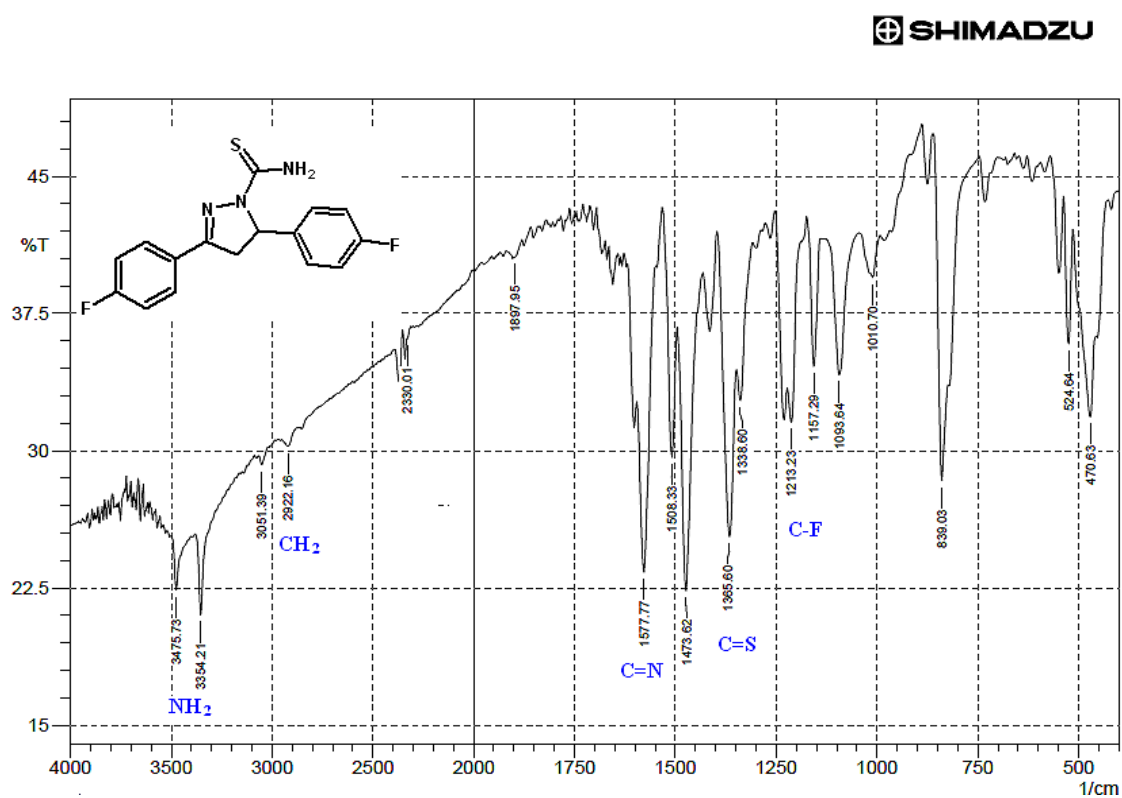

**Figure S3.**  $^1\text{H}$  NMR spectrum of 3,5-bis(4-fluorophenyl)-4,5-dihydro-1*H*-pyrazole-1-carboxamide (**1**).

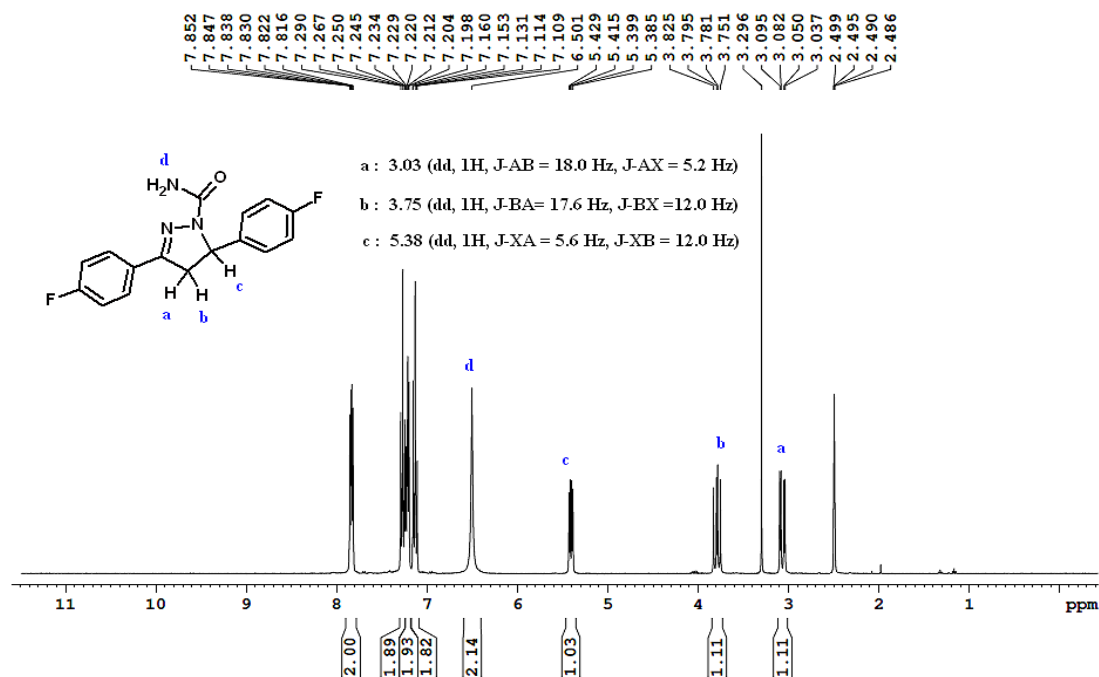

**Figure S4.**  $^1\text{H}$  NMR spectrum of 3,5-bis(4-fluorophenyl)-4,5-dihydro-1*H*-pyrazole-1-carbothioamide (**2**).

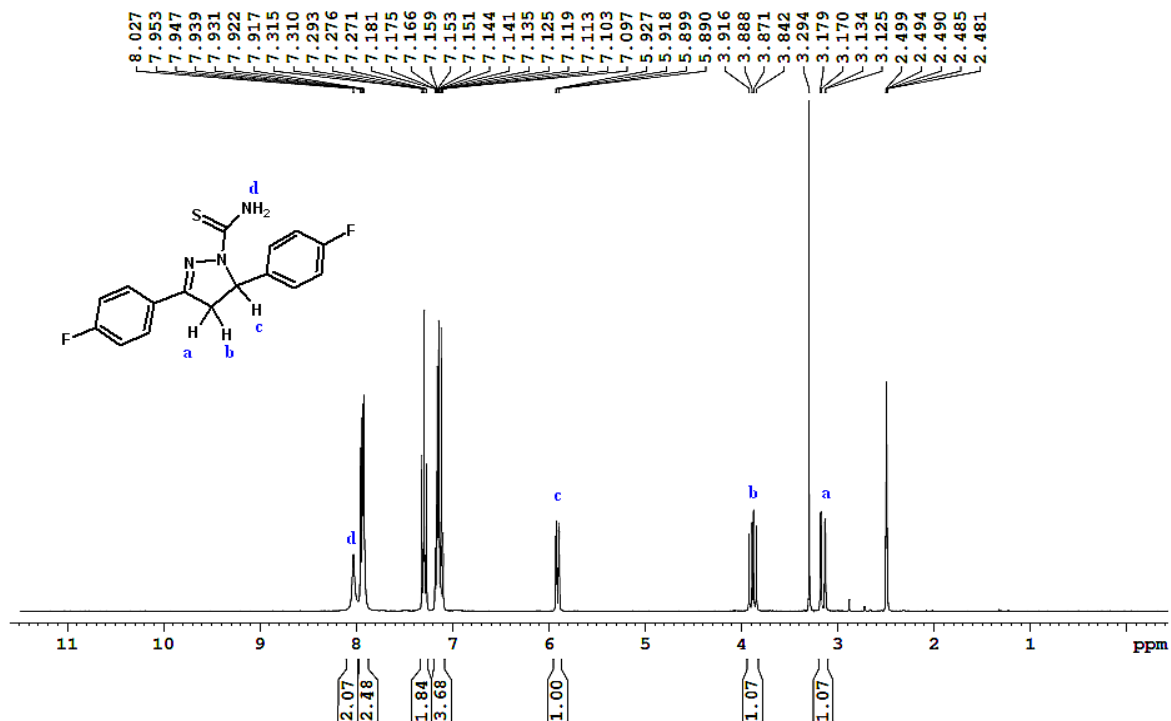

**Figure S5.** LCMS of 3,5-bis(4-fluorophenyl)-4,5-dihydro-1H-pyrazole-1-carboxamide (**1**).

=====

|                |                                   |               |           |
|----------------|-----------------------------------|---------------|-----------|
| Data file      | : C:\CHEM32\1\DATA\300611000016.D | Vial No.      | : P1-A-03 |
| Injection Date | : 30/06/2011                      | Injection vol | : 4µL     |
| Sample Name    | : IN1703-SS-04                    | Acq Method    | : 7030.M  |

=====

Method info : Mobile Phase:A=0.1% Formic Acid, B= ACN  
Flow: 2.0ml/min,Temp:30.0°C

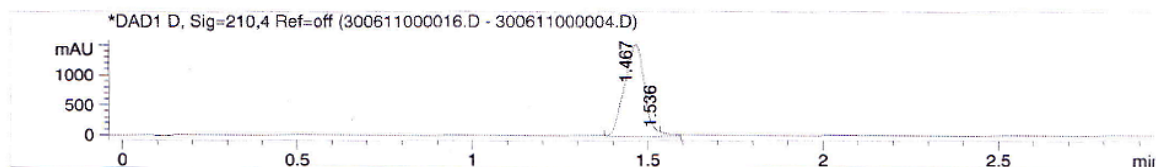

| Peak No | RT min | Area       | Area % |
|---------|--------|------------|--------|
| 1       | 1.467  | 6.135e+003 | 97.748 |
| 2       | 1.536  | 1.413e+002 | 2.252  |

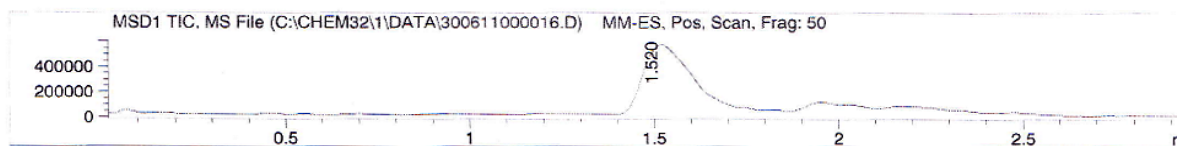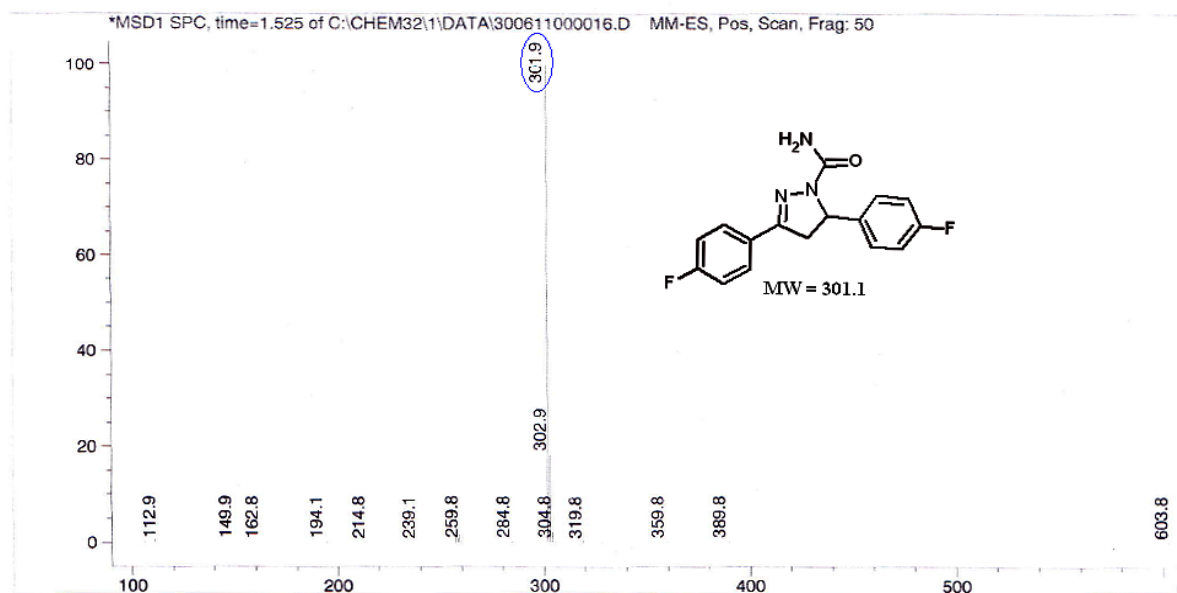

**Figure S6.** LCMS of 3,5-bis(4-fluorophenyl)-4,5-dihydro-1H-pyrazole-1-carbothioamide (**2**).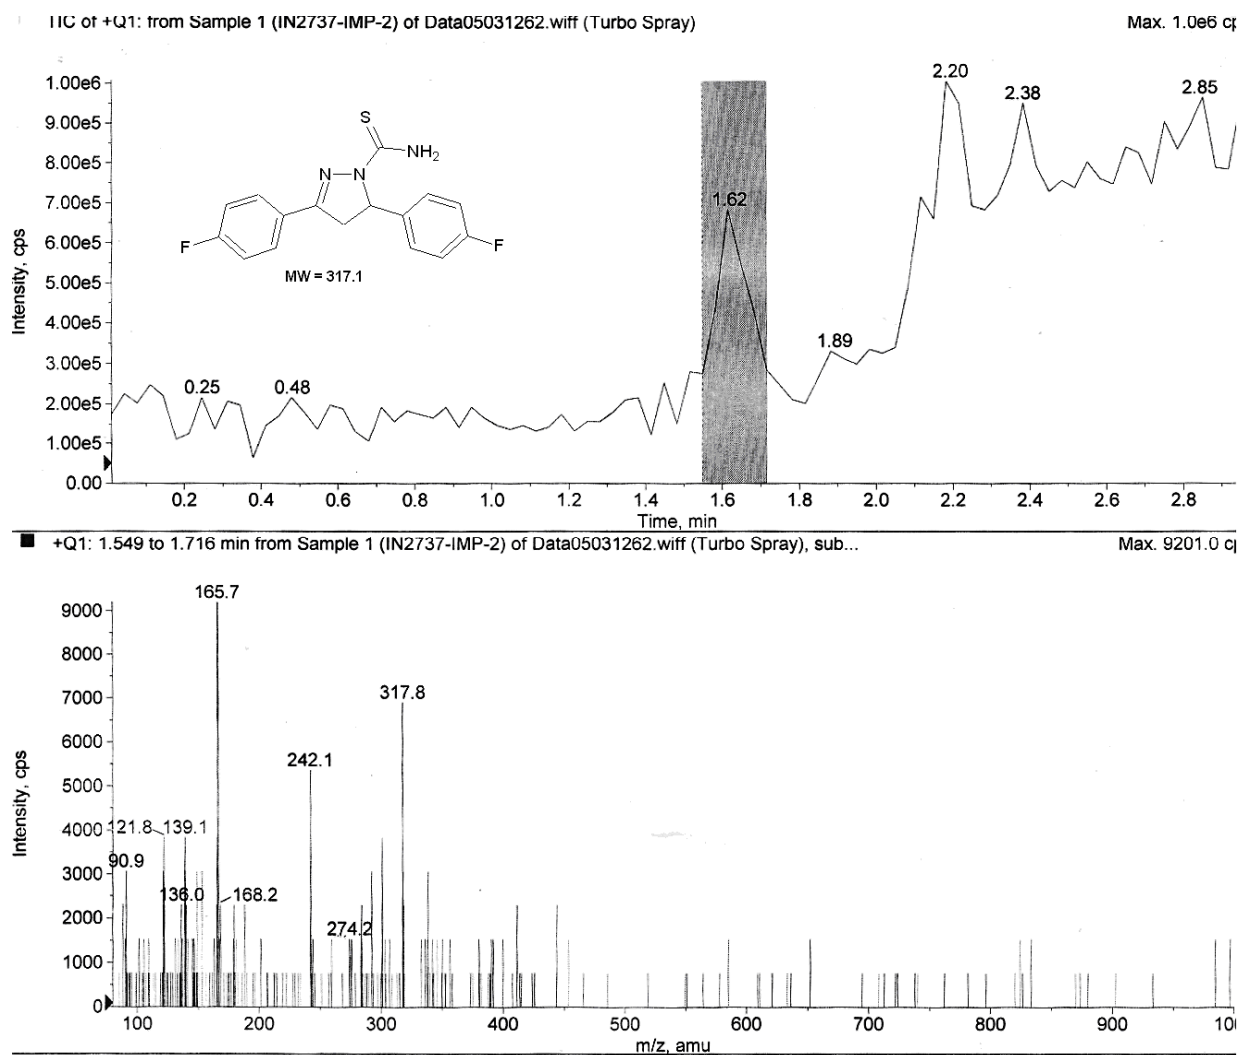

Supplement: s1 [file s1]
